# Supplementary material for: A time frame permissive for Protein Kinase D2 activity to direct angiogenesis in mouse embryonic stem cells
Source: PubMed Central journal article supplement (PMC4493579; doi:10.1038/srep11742), 2015-07-07
Supplement: srep11742-s1.pdf [file srep11742-s1.pdf]

# **A time frame permissive for Protein Kinase D2 activity to direct angiogenesis in mouse embryonic stem cells**

Martin Müller<sup>1\*#</sup>, Jana Schröer<sup>1\*</sup>, Ninel Azoitei<sup>1</sup>, Tim Eiseler<sup>1</sup>, Wendy Bergmann<sup>1</sup>, Ralf Köhntop<sup>1</sup>,  
Qiong Lin<sup>2</sup>, Ivan G Costa<sup>4</sup>, Martin Zenke<sup>2</sup>, Felicitas Genze<sup>3</sup>, Clair Weidgang<sup>1</sup>, Thomas Seufferlein<sup>1</sup>,  
Stefan Liebau<sup>5#</sup>, Alexander Kleger<sup>1#</sup>

<sup>1</sup> Department of Internal Medicine I, Ulm University, Ulm, Germany

<sup>2</sup> Department of Cell Biology, Institute for Biomedical Engineering, Medical Faculty, RWTH University Aachen, Germany

<sup>3</sup> Department of Urology, Ulm University, Ulm, Germany

<sup>4</sup> IZKF Computational Biology Research Group, RWTH Aachen University Medical School, Germany

<sup>5</sup> Institute of Neuroanatomy, Eberhard Karls University Tuebingen, Tuebingen, Germany

## Supplemental Figure Legends

**Supplemental Figure 1: Effects of early overexpression in a second independently targeted iPKD2 ESC line.** The generation of this second iPKD2 cell line was performed according to **Figure 2A**.

Cultures were stimulated as illustrated in **Figure 3A**. Expression levels of **(A) FoxA2**, **(B) Pax6**, **(C) Flk1**, **(D) cKit**, **(E) Isl1** and **(F) Tbx5** on day 4 of embryoid body differentiation are shown. Supplemental Experiments were performed n=2.

**Supplemental Figure 2: Differentiation of PKD2-kinase dead EBs derived from a second iPSC clone.**

These data were generated from two clones (WT and KD) further expanded after picking from reprogramming MEF cultures from the same genotype. Regulation of **(A) FoxA2**, **(B) Pax6**, **(C) Pdgfr**, **(D) cKit**, **(E) Isl1** and **(F) Tbx5** on day 4 of differentiation is shown. EB differentiation was performed according to **Figure 6A**. KD: kinase dead, WT: wild type. Supplemental Experiments were performed n=2.

## Supplemental Table 1

List of adjusted p-values for Figure 3

## Supplemental Table 2

List of adjusted p-values for Figure 4

## Supplemental Table 3

List of adjusted p-values for Figure 6

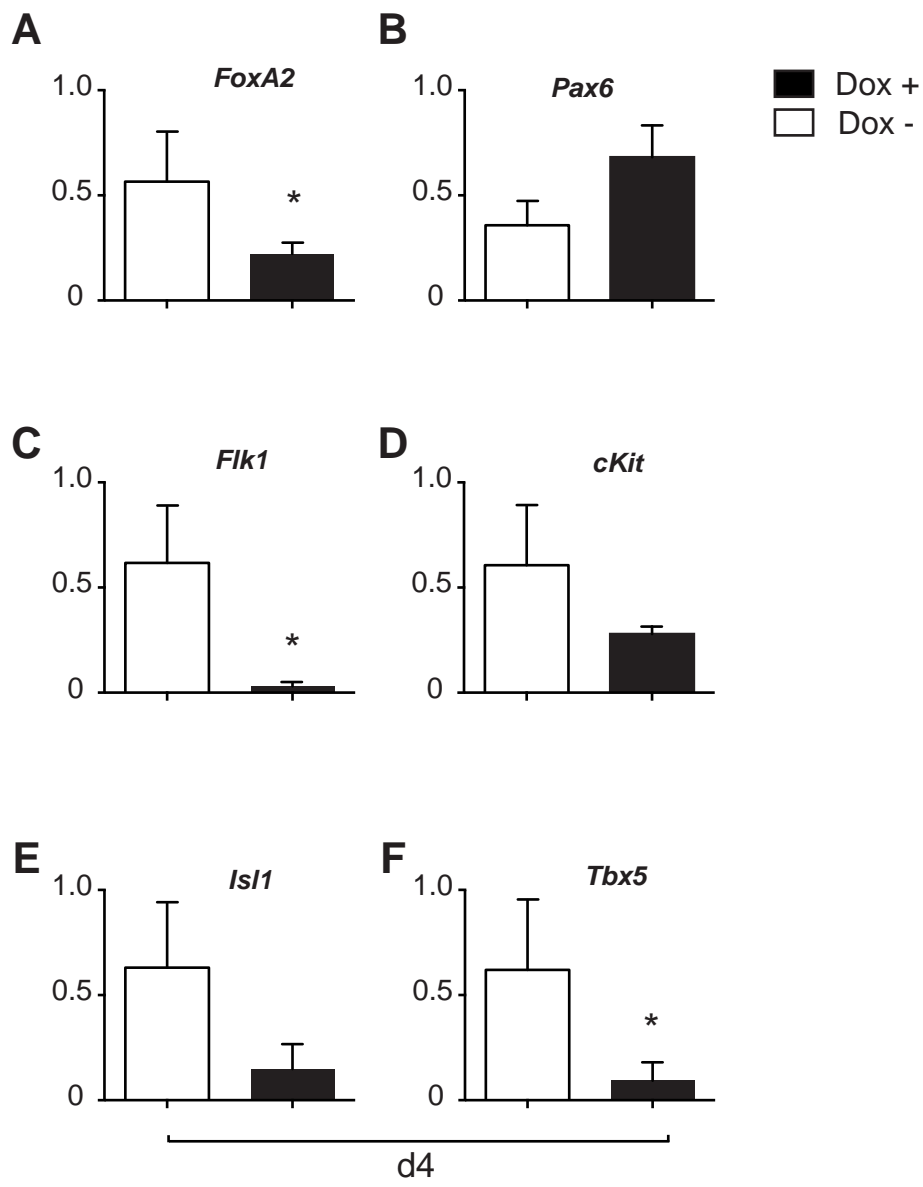

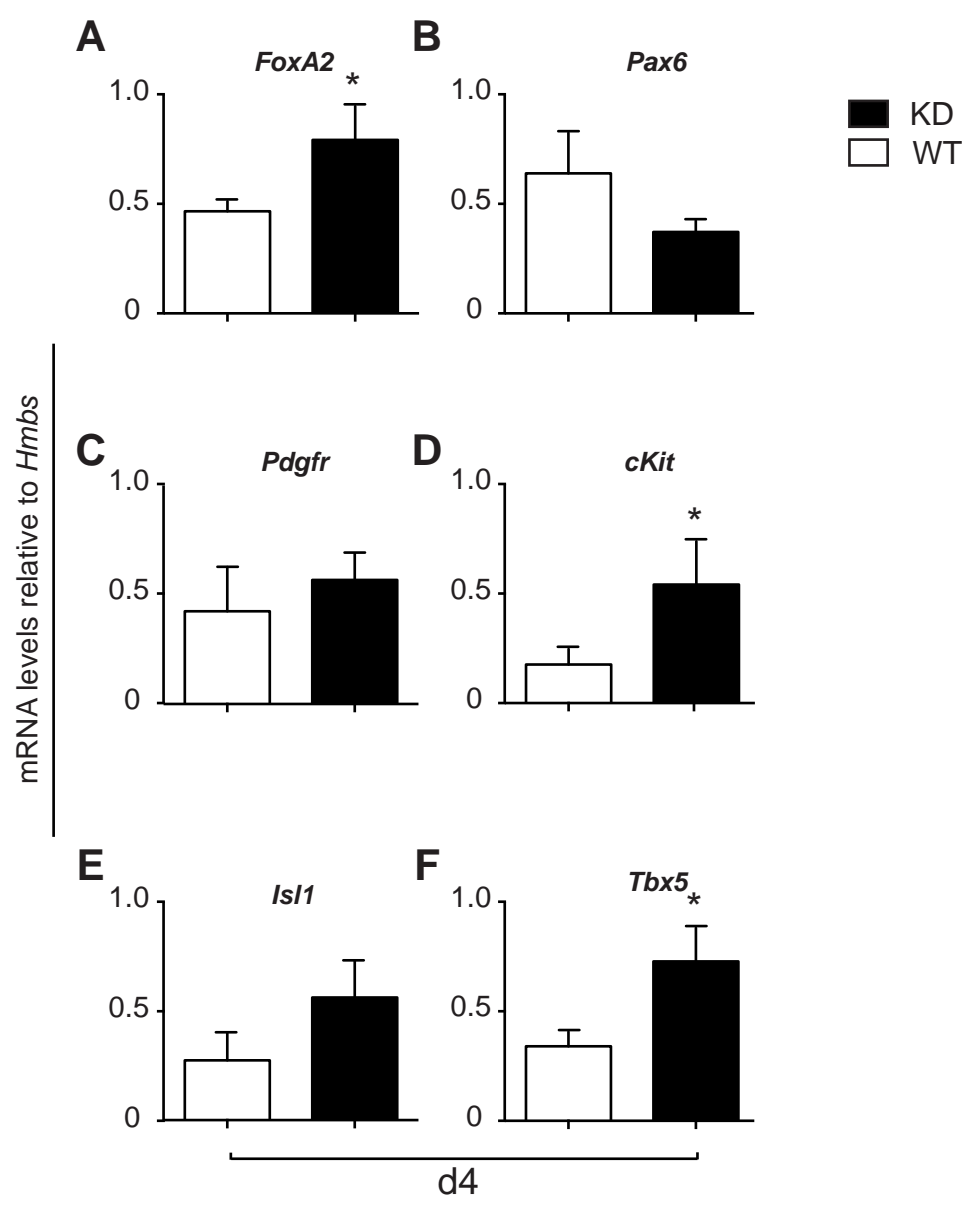

| Time point | Gene  | p-value (two-side t-test) | adjusted p-value (Bonferroni multiple correction) | Figure |
|------------|-------|---------------------------|---------------------------------------------------|--------|
| D3         | Bry   | 0,059481475               | 0,083221214                                       | 3B     |
| D4         | Bry   | <b>7,70395E-05</b>        | <b>0,000693356</b>                                | 3B     |
| D3         | FoxA2 | <b>0,00020887</b>         | <b>0,001009031</b>                                | 3C     |
| D4         | FoxA2 | <b>0,023789172</b>        | 0,051177564                                       | 3C     |
| D3         | Pax6  | 0,801834803               | 0,849001556                                       | 3D     |
| D4         | Pax6  | <b>0,027426034</b>        | 0,051177564                                       | 3D     |
| D3         | Flk1  | <b>6,97731E-06</b>        | <b>0,000125592</b>                                | 3E     |
| D4         | Flk1  | <b>0,002290388</b>        | <b>0,005889569</b>                                | 3E     |
| D3         | cKit  | 0,587340367               | 0,660757913                                       | 3F     |
| D4         | cKit  | <b>0,032948463</b>        | 0,053915667                                       | 3F     |
| D3         | PDGFR | 0,06010421                | 0,083221214                                       | 3G     |
| D4         | PDGFR | <b>0,000425008</b>        | <b>0,001381395</b>                                | 3G     |
| D3         | Tbx5  | 0,896096854               | 0,896096854                                       | 3H     |
| D4         | Tbx5  | <b>0,000460465</b>        | <b>0,001381395</b>                                | 3H     |
| D3         | Isl1  | 0,193981782               | 0,249405148                                       | 3I     |
| D4         | Isl1  | <b>0,02843198</b>         | 0,051177564                                       | 3I     |

| Time point | Gene  | p-value (two-side t-test) | adjusted p-value (Bonferroni multiple correction) | Figure |
|------------|-------|---------------------------|---------------------------------------------------|--------|
| D6         | Tubb3 | <b>0,02071165</b>         | <b>0,02867767</b>                                 | 3J     |
| D9         | Tubb3 | <b>0,000976387</b>        | <b>0,00210614</b>                                 | 3J     |
| D14        | Tubb3 | 0,147065741               | 0,16544900                                        | 3J     |
| D6         | Myl2a | <b>0,000437502</b>        | <b>0,00157501</b>                                 | 3K     |
| D9         | Myl2a | <b>4,01256E-06</b>        | <b>0,00005283</b>                                 | 3K     |
| D14        | Myl2a | <b>2,53933E-05</b>        | <b>0,00015236</b>                                 | 3K     |
| D6         | Myh6  | <b>0,00072598</b>         | <b>0,00210614</b>                                 | 3L     |
| D9         | Myh6  | <b>0,018740047</b>        | <b>0,02811007</b>                                 | 3L     |
| D14        | Myh6  | <b>8,08518E-05</b>        | <b>0,00036383</b>                                 | 3L     |
| D6         | CD34  | <b>5,86989E-06</b>        | <b>0,00005283</b>                                 | 3N     |
| D9         | CD34  | 0,112694398               | 0,14489280                                        | 3N     |
| D14        | CD34  | <b>0,011219655</b>        | <b>0,01835944</b>                                 | 3N     |
| D6         | CD31  | <b>0,001644655</b>        | <b>0,00296038</b>                                 | 3O     |
| D9         | CD31  | 0,258172333               | 0,27335890                                        | 3O     |
| D14        | CD31  | <b>0,001053071</b>        | <b>0,00210614</b>                                 | 3O     |

| Time point | Compared Pair         | Gene  | p-value (Anova PostHoc) | adjusted p-value (Bonferroni multiple correction) | Figure |
|------------|-----------------------|-------|-------------------------|---------------------------------------------------|--------|
| D6         | Control vs. Dox 0-14  | Myh6  | 0,1322842               | 0,210098435                                       | 4B     |
| D6         | Control vs. Dox 4-14  | Myh6  | 0,5332273               | 0,625962483                                       | 4B     |
| D6         | Dox 4-14 vs. Dox 0-14 | Myh6  | <b>0,0170378</b>        | <b>0,040001791</b>                                | 4B     |
| D9         | Control vs. Dox 0-14  | Myh6  | <b>0,000227</b>         | <b>0,0030645</b>                                  | 4B     |
| D9         | Control vs. Dox 4-14  | Myh6  | <b>0,0212022</b>        | <b>0,04770495</b>                                 | 4B     |
| D9         | Dox 4-14 vs. Dox 0-14 | Myh6  | <b>0,0000014</b>        | <b>0,0000756</b>                                  | 4B     |
| D14        | Control vs. Dox 0-14  | Myh6  | <b>0,000299</b>         | <b>0,0032292</b>                                  | 4B     |
| D14        | Control vs. Dox 4-14  | Myh6  | <b>0,00765</b>          | <b>0,018777273</b>                                | 4B     |
| D14        | Dox 4-14 vs. Dox 0-14 | Myh6  | 0,2574168               | 0,356423262                                       | 4B     |
| D6         | Control vs. Dox 0-14  | Myl2a | 0,0517894               | 0,096435434                                       | 4C     |
| D6         | Control vs. Dox 4-14  | Myl2a | 0,5085178               | 0,61933524                                        | 4C     |
| D6         | Dox 4-14 vs. Dox 0-14 | Myl2a | <b>0,0055507</b>        | <b>0,015775674</b>                                | 4C     |
| D9         | Control vs. Dox 0-14  | Myl2a | <b>0,0246724</b>        | 0,053292384                                       | 4C     |
| D9         | Control vs. Dox 4-14  | Myl2a | <b>0,0351163</b>        | 0,067724293                                       | 4C     |
| D9         | Dox 4-14 vs. Dox 0-14 | Myl2a | <b>0,0001081</b>        | <b>0,0025758</b>                                  | 4C     |
| D14        | Control vs. Dox 0-14  | Myl2a | <b>0,0001431</b>        | <b>0,0025758</b>                                  | 4C     |
| D14        | Control vs. Dox 4-14  | Myl2a | <b>0,00132</b>          | <b>0,00594</b>                                    | 4C     |
| D14        | Dox 4-14 vs. Dox 0-14 | Myl2a | 0,4939166               | 0,61933524                                        | 4C     |
| D6         | Control vs. Dox 0-14  | CD31  | 0,5161127               | 0,61933524                                        | 4E     |
| D6         | Control vs. Dox 4-14  | CD31  | <b>0,0299535</b>        | 0,0621442                                         | 4E     |
| D6         | Dox 4-14 vs. Dox 0-14 | CD31  | <b>0,0032149</b>        | <b>0,010212035</b>                                | 4E     |
| D9         | Control vs. Dox 0-14  | CD31  | 0,9861775               | 0,9996584                                         | 4E     |
| D9         | Control vs. Dox 4-14  | CD31  | <b>0,0004214</b>        | <b>0,003519257</b>                                | 4E     |
| D9         | Dox 4-14 vs. Dox 0-14 | CD31  | <b>0,0005724</b>        | <b>0,0038637</b>                                  | 4E     |
| D14        | Control vs. Dox 0-14  | CD31  | 0,2320964               | 0,3298212                                         | 4E     |
| D14        | Control vs. Dox 4-14  | CD31  | 0,1699757               | 0,262248223                                       | 4E     |
| D14        | Dox 4-14 vs. Dox 0-14 | CD31  | <b>0,006621</b>         | <b>0,017336829</b>                                | 4E     |
| D6         | Control vs. Dox 0-14  | CD34  | 0,9691476               | 0,9996584                                         | 4F     |
| D6         | Control vs. Dox 4-14  | CD34  | <b>0,0015762</b>        | <b>0,006547292</b>                                | 4F     |
| D6         | Dox 4-14 vs. Dox 0-14 | CD34  | <b>0,0009848</b>        | <b>0,004853127</b>                                | 4F     |
| D9         | Control vs. Dox 0-14  | CD34  | 0,9996584               | 0,9996584                                         | 4F     |
| D9         | Control vs. Dox 4-14  | CD34  | <b>0,0009416</b>        | <b>0,004853127</b>                                | 4F     |
| D9         | Dox 4-14 vs. Dox 0-14 | CD34  | <b>0,0009886</b>        | <b>0,004853127</b>                                | 4F     |
| D14        | Control vs. Dox 0-14  | CD34  | 0,6065573               | 0,696895621                                       | 4F     |
| D14        | Control vs. Dox 4-14  | CD34  | <b>0,0030665</b>        | <b>0,010212035</b>                                | 4F     |
| D14        | Dox 4-14 vs. Dox 0-14 | CD34  | <b>0,0004562</b>        | <b>0,003519257</b>                                | 4F     |
| D6         | Control vs. Dox 0-14  | vWF   | 0,6416134               | 0,721815075                                       | 4G     |
| D6         | Control vs. Dox 4-14  | vWF   | 0,3461266               | 0,46727091                                        | 4G     |
| D6         | Dox 4-14 vs. Dox 0-14 | vWF   | 0,8582981               | 0,926961948                                       | 4G     |
| D9         | Control vs. Dox 0-14  | vWF   | 0,2003191               | 0,297414924                                       | 4G     |
| D9         | Control vs. Dox 4-14  | vWF   | <b>0,0037149</b>        | <b>0,0111447</b>                                  | 4G     |
| D9         | Dox 4-14 vs. Dox 0-14 | vWF   | 0,122413                | 0,200312182                                       | 4G     |
| D14        | Control vs. Dox 0-14  | vWF   | 0,0806137               | 0,140423865                                       | 4G     |
| D14        | Control vs. Dox 4-14  | vWF   | 0,9757157               | 0,9996584                                         | 4G     |
| D14        | Dox 4-14 vs. Dox 0-14 | vWF   | 0,1174439               | 0,198186581                                       | 4G     |

| Time point | Gene  | p-value (two-side t-test) | adjusted p-value (Bonferroni multiple correction) | Figure |
|------------|-------|---------------------------|---------------------------------------------------|--------|
| D2         | Bry   | 0,926812518               | 0,926812518                                       | 6B     |
| D4         | Bry   | 0,926812518               | 0,926812518                                       | 6B     |
| D2         | FoxA2 | 0,083579763               | 0,148586245                                       | 6C     |
| D4         | FoxA2 | <b>0,001387437</b>        | <b>0,008184587</b>                                | 6C     |
| D2         | Pax6  | 0,801834803               | 0,916382632                                       | 6D     |
| D4         | Pax6  | <b>0,027426034</b>        | 0,087763309                                       | 6D     |
| D2         | Tubb3 | 0,060893021               | 0,121786042                                       | 6E     |
| D4         | Tubb3 | 0,318056623               | 0,427560057                                       | 6E     |
| D2         | cKit  | <b>0,048032543</b>        | 0,10978867                                        | 6F     |
| D4         | cKit  | <b>0,004197417</b>        | <b>0,016789668</b>                                | 6F     |
| D2         | PDGFR | <b>0,042149463</b>        | 0,10978867                                        | 6G     |
| D4         | PDGFR | 0,335996041               | 0,427560057                                       | 6G     |
| D2         | Tbx5  | 0,347392546               | 0,427560057                                       | 6H     |
| D4         | Tbx5  | <b>0,00153461</b>         | <b>0,008184587</b>                                | 6H     |
| D2         | Isl1  | <b>0,001330794</b>        | <b>0,008184587</b>                                | 6I     |
| D4         | Isl1  | 0,118332618               | 0,189332189                                       | 6I     |

| Time point | Gene  | p-value (two-side t-test) | adjusted p-value (Bonferroni multiple correction) | Figure |
|------------|-------|---------------------------|---------------------------------------------------|--------|
| D9         | CD34  | 0,382383352               | 0,38238335                                        | 6J     |
| D14        | CD34  | <b>0,009067221</b>        | <b>0,02731819</b>                                 | 6J     |
| D9         | CD31  | 0,056244612               | 0,07030576                                        | 6K     |
| D14        | CD31  | <b>0,012394669</b>        | <b>0,02731819</b>                                 | 6K     |
| D9         | vWF   | <b>0,001142494</b>        | <b>0,01142494</b>                                 | 6L     |
| D14        | vWF   | 0,055140116               | 0,07030576                                        | 6L     |
| D9         | MyI2A | <b>0,005073762</b>        | <b>0,02536881</b>                                 | 6M     |
| D14        | MyI2A | 0,065125459               | 0,07236162                                        | 6M     |
| D9         | MyH6  | <b>0,01632989</b>         | <b>0,02731819</b>                                 | 6N     |
| D14        | MyH6  | <b>0,016390913</b>        | <b>0,02731819</b>                                 | 6N     |
